# Supplementary material
Source: Elsevier journal article supplement (https://www.sciencedirect.com/science/article/pii/S0213911119302134)
Supplement: mmc1 [file S0213911119302134:mmc1.docx]

**Apéndice**

**Tabla I**

Características sociodemográficas de las personas participantes en el estudio que respondieron solo la encuesta al inicio y de las que lo hicieron al inicio y al año de seguimiento.

|  | **Pre**  **(n = 249)** |  | **Pre-post**  **(n = 699)** |  |
| --- | --- | --- | --- | --- |
|  | **N (%)** |  | **N (%)** | **p** |
| *Edad basal* |  |  |  | 0,077 |
| 16 a 24 años | 35 (14,1) |  | 63 (9,0) |  |
| 25 a 54 años | 190 (76,3) |  | 560 (80,1) |  |
| 55 a 64 años | 24 (9,6) |  | 76 (10,9) |  |
| Valores perdidos | -- |  | -- |  |
| Total | 249 (100) |  | 699 (100) |  |
| *Sexo* |  |  |  | 0,244 |
| Mujeres | 109 (43,8) |  | 336 (48,1) |  |
| Hombres | 140 (56,2) |  | 363 (51,9) |  |
| Valores perdidos | -- |  | -- |  |
| Total | 249 (100) |  | 699 (100) |  |
|  |  |  |  |  |
| *Clase social basal* |  |  |  | 0,005 |
| No manual | 33 (13,3) |  | 105 (15,1) |  |
| Manual cualificado y semicualificado | 70 (28,1) |  | 264 (37,7) |  |
| Manual no cualificado  Valores perdidos  Total | 118 (47,4)  28 (11,2)  249 (100) |  | 285 (40,8)  45 (6,4)  699 (100) |  |

**Tabla II**

Características sociodemográficas de las personas participantes en el estudio que respondieron la pregunta sobre retrasos en el pago y las que no lo hicieron o no pudieron clasificarse

|  | **Clasificables**  **(n = 759)** |  | **Valores perdidos o no clasificables**  **(n = 189)** |  |
| --- | --- | --- | --- | --- |
|  | **N (%)** |  | **N (%)** | **p** |
| *Edad basal* |  |  |  | 0,007 |
| 16 a 24 años | 82 (10,8) |  | 11 (6,0) |  |
| 25 a 54 años | 603 (79,4) |  | 144 (76,2) |  |
| 55 a 64 años | 74 (9,8) |  | 34 (17,8) |  |
| Valores perdidos | -- |  | -- |  |
| Total | 759 (100) |  | 189 (100) |  |
| *Sexo* |  |  |  | 0,061 |
| Mujeres | 368 (48,5) |  | 61 (32,2) |  |
| Hombres | 391 (51,5) |  | 128 (67,8) |  |
| Valores perdidos | -- |  | -- |  |
| Total | 759 (100) |  | 189 (100) |  |
|  |  |  |  |  |
| *Clase social basal* |  |  |  | 0,081 |
| No manual | 115 (15,2) |  | 21 (11,1) |  |
| Manual cualificado y semicualificado | 277 (36,5) |  | 53 (28,1) |  |
| Manual no cualificado  Valores perdidos  Total | 326 (42,9)  41 (5,4)  759 (100) |  | 83 (43,9)  32 (16,9)  189 (100) |  |
